# Supplementary material for: Charge transport effect and photovoltaic conversion of two-dimensional CdSeS quantum dot monolayers in inverted polymer solar cells
Source: Royal Society of Chemistry journal article supplement (doi:10.1039/c9tc04227j), 2019-01-01
Supplement: c9tc04227j1.pdf [file c9tc04227j1.pdf]

## Supporting Information

### **Charge Transport Effect and Photovoltaic Conversion of Two-dimensional CdSeS Quantum Dot Monolayer in Inverted Polymer Solar Cells**

Guh-Hwan Lim<sup>†,+</sup>, Kyu Seung Lee<sup>†, ‡, +</sup>, Young Jae Park<sup>†</sup>, Jaeho Shim<sup>†</sup>, Jin Woo Choi<sup>§</sup>, Minju Kim<sup>||</sup>, Yeonghoon Jin<sup>¶</sup>, Byungkwon Lim<sup>‡</sup>, Yeonjin Yi<sup>||</sup>, Chang-Lyoul Lee<sup>§,\*</sup>, Jun Yeon Hwang<sup>†,\*</sup>  
and Dong Ick Son<sup>†, #, +,\*</sup>

<sup>†</sup>Institute of Advanced Composite Materials, Korea Institute of Science and Technology, 92 Chudong-ro, Bongdong-eup, Wanju-gun, Jeonbuk, 55324, Republic of Korea

<sup>‡</sup>School of Advanced Materials Science and Engineering, Sungkyunkwan University (SKKU), Suwon 16419, Republic of Korea

<sup>§</sup>Advanced Photonics Research Institute (APRI), Gwangju Institute of Science and Technology (GIST), Gwangju 61005, Republic of Korea

<sup>||</sup>Department of Physics, Yonsei University, Seoul 03722, Republic of Korea

<sup>¶</sup>School of Electrical Engineering, Korea Advanced Institute of Science and Technology, Daejeon 34141, Republic of Korea

<sup>#</sup>KIST school, Department of Nanomaterials and Nano Science, University of Science and Technology (UST), Daejeon 34113, Republic of Korea

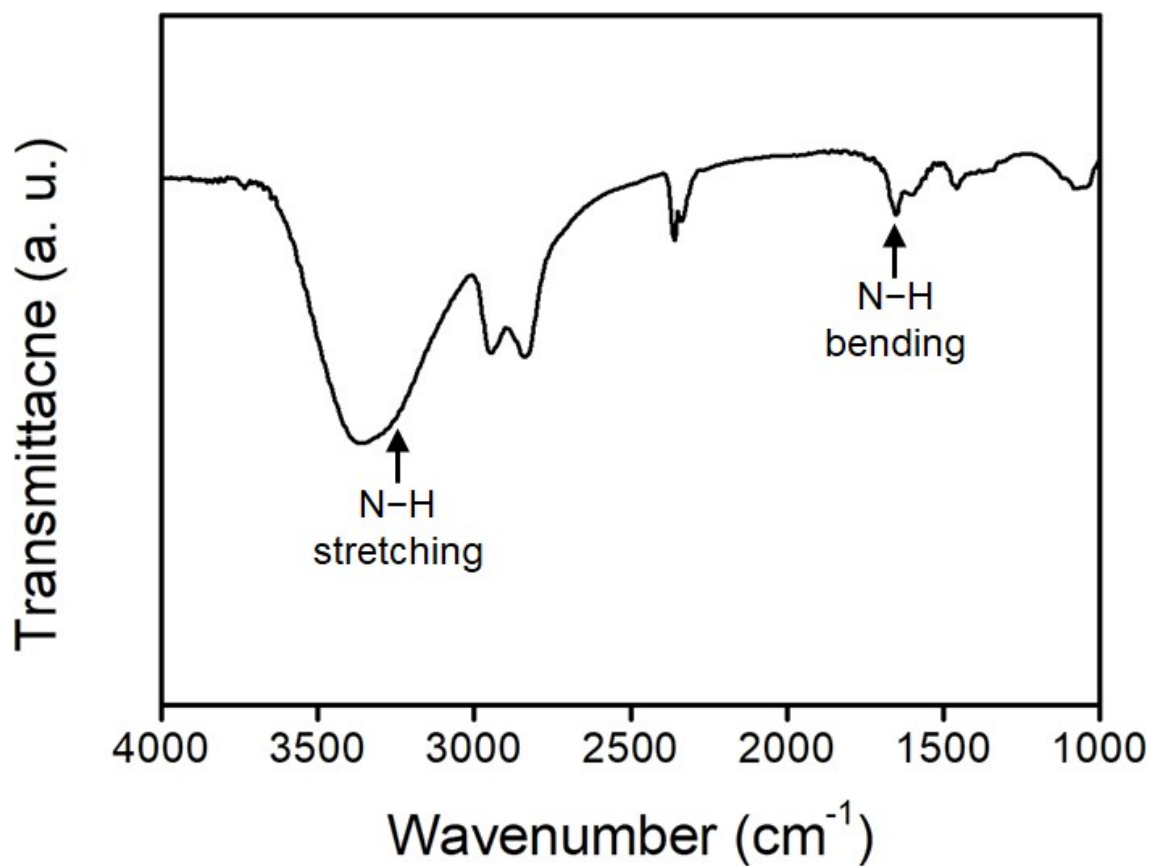

**Figure S1.** FT-IR spectrum of the PEIE on the ITO substrate.

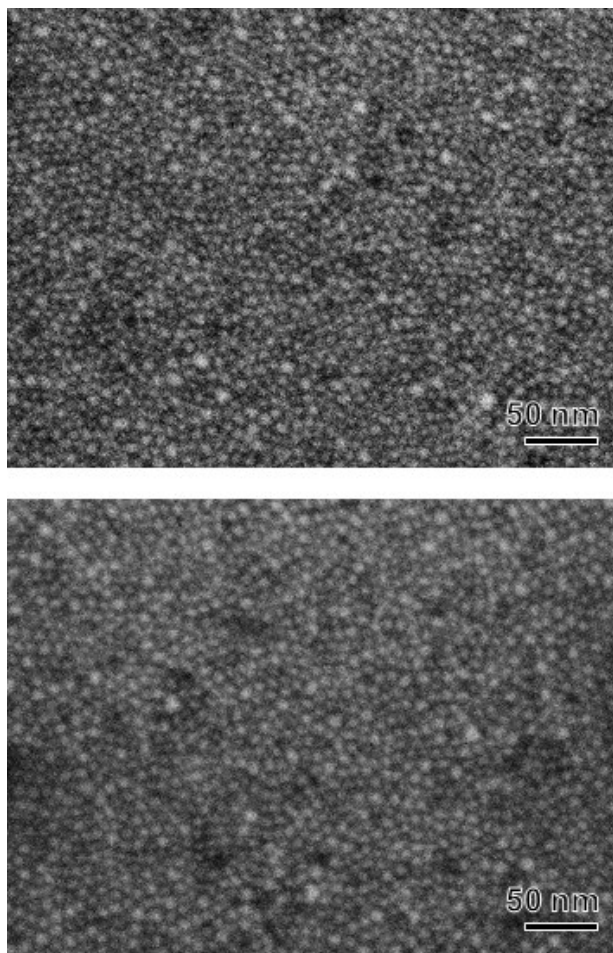

**Figure S2.** Additional SEM images of the CdSeS QDM on PEIE layer. From these images, an average density of the CdSeS QDs was measured to be around  $1.61 \times 10^{12} \text{ cm}^{-2}$ .

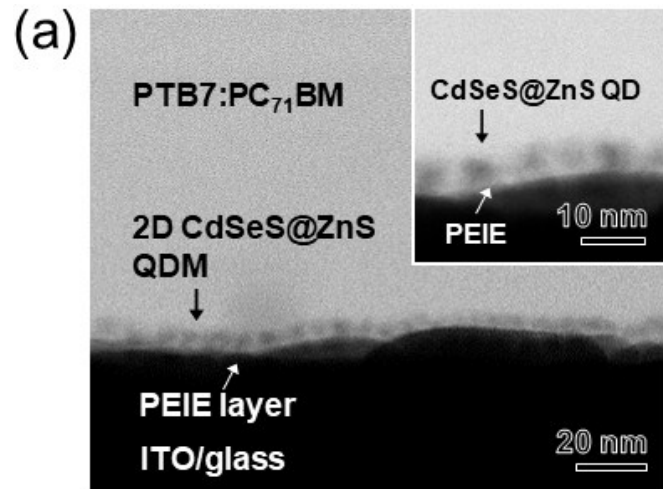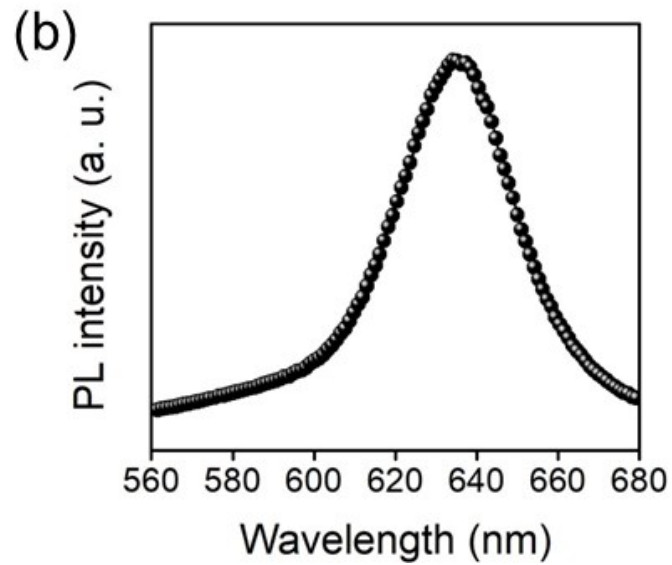

**Figure S3.** (a) The cross-section TEM and HRTEM (inset) images of the iPSCs with the 2D CdSeS@ZnS QDM. (b) PL spectrum of the 2D CdSeS@ZnS QDM by using a RISE technique.

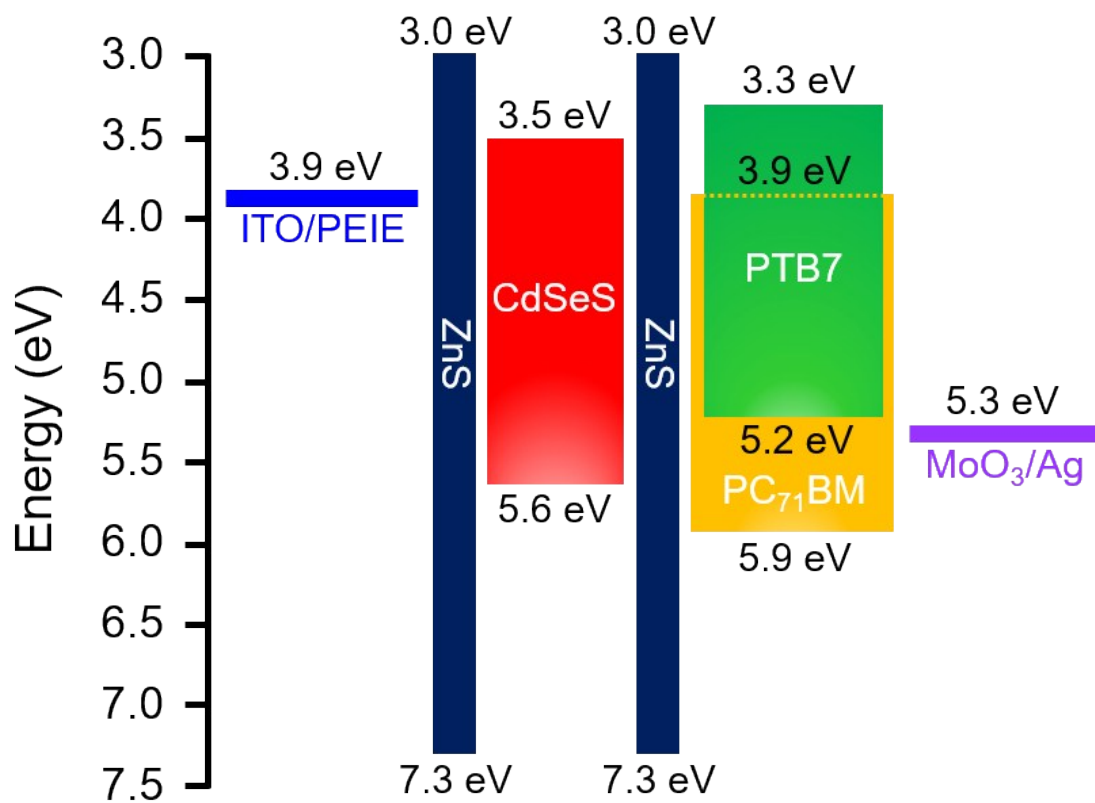

**Figure S4.** Energy level diagram of the iPSC with the 2D CdSeS@ZnS QDM.

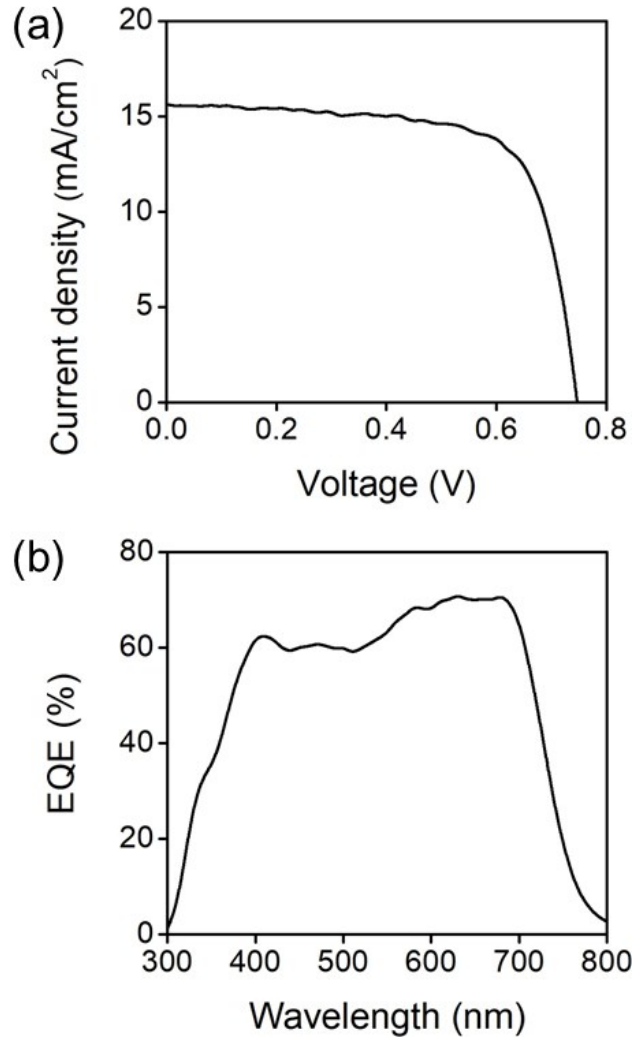

**Figure S5.** (a)  $J$ - $V$  characteristics of the iPSCs with the 2D CdSeS@ZnS QDM under the illumination of AM 1.5, 100 mW/cm<sup>2</sup>. (b) EQE spectra of the iPSCs with the 2D CdSeS@ZnS QDM.

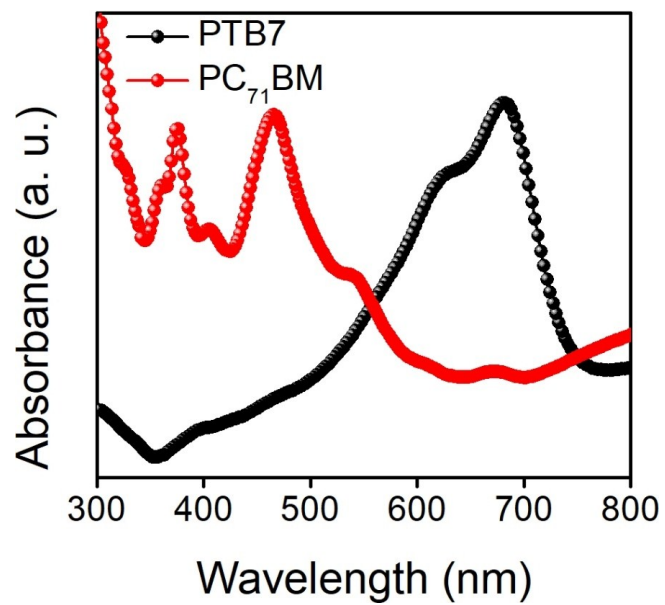

**Figure S6.** Absorption spectra of the PTB7 (black) and PC<sub>71</sub>BM (red) films.

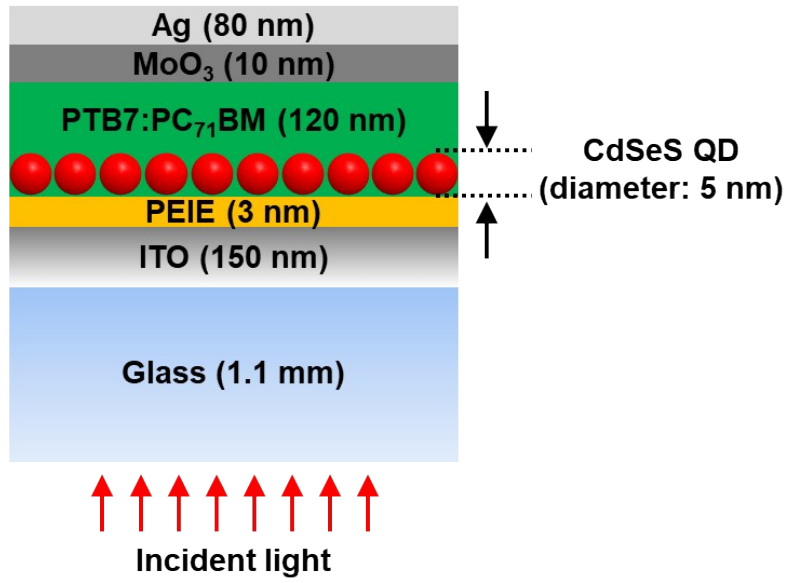

**Figure S7.** A schematic illustration of the ITO/PEIE/PTB7:PC<sub>71</sub>BM/MoO<sub>3</sub>/Ag structure for the FDTD simulation.



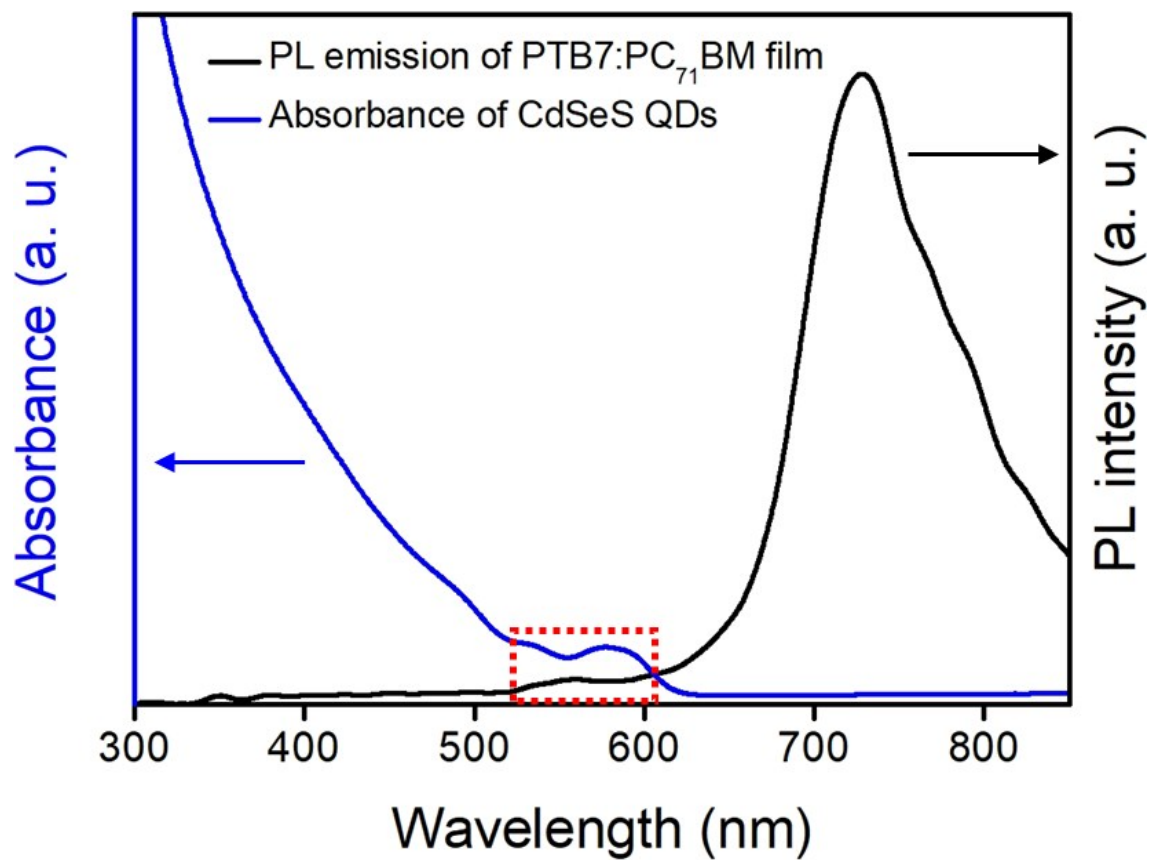

**Figure S8.** The UV-vis absorption spectrum of the CdSeS QDs dispersed in a toluene vs. the PL emission spectrum of the PTB7:PC<sub>71</sub>BM film.

**Table S1.** Characteristics of iPSC devices with the 2D CdSeS@ZnS QDM.

| Sample                        | max. $V_{OC}$<br>(avg.)<br>(V) | max. $J_{SC}$<br>(avg.)<br>(mA/cm <sup>2</sup> ) | max. FF<br>(avg.) | max. PCE<br>(avg.)<br>(%) |
|-------------------------------|--------------------------------|--------------------------------------------------|-------------------|---------------------------|
| iPSC with<br>2D CdSeS@ZnS QDM | 0.75<br>(0.74)                 | 15.58<br>(15.46)                                 | 71.00<br>(71.40)  | 8.25<br>(8.21)            |
